# Supplementary material for: Extremely high Cassie–Baxter state stability of superhydrophobic surfaces via precisely tunable dual-scale and triple-scale micro–nano structures
Source: Royal Society of Chemistry journal article supplement (doi:10.1039/c9ta04484a), 2019-01-01
Supplement: c9ta04484a5.pdf [file c9ta04484a5.pdf]

## Supplementary Information

# Cassie-Baxter State Stability of a 3D Micro- nano Hierarchical Superhydrophobic Surface Fabricated by a Laser-Chemical Hybrid Method

*Rui Pan, Mingyong Cai, Weijian Liu, Xiao Luo, Changhao Chen, Hongjun Zhang,*

*Minlin Zhong\**

Laser Materials Processing Research Center, School of materials science and  
engineering, Tsinghua University, Beijing, P. R. China, 100084

\*Email: zhml@tsinghua.edu.cn

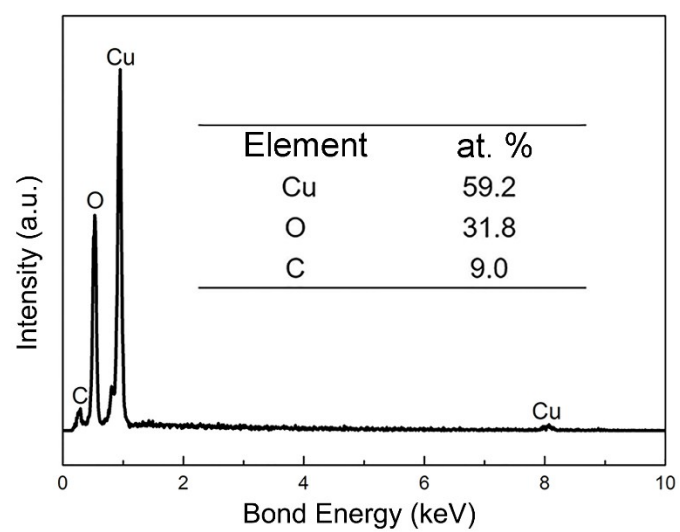

**Figure S1.** EDS analysis of the marked area A in Fig. 1(f1)

**Table S1.** The fabrication conditions and structural parameters of different MNT structures

| Samples | Laser ablation             |      | Chemical oxidation |            | Microcones                  |                          | Nanorods                 |
|---------|----------------------------|------|--------------------|------------|-----------------------------|--------------------------|--------------------------|
|         | Interval ( $\mu\text{m}$ ) | Time | Temperature        | Time (min) | Periodity ( $\mu\text{m}$ ) | Height ( $\mu\text{m}$ ) | Length ( $\mu\text{m}$ ) |
| P40     | 40                         | 35   | RT                 | 20         | 40 $\pm$ 2                  | 50 $\pm$ 3               | 15 $\pm$ 2               |
| P60     | 60                         | 35   | RT                 | 20         | 60 $\pm$ 2                  | 50 $\pm$ 3               | 15 $\pm$ 2               |
| P80     | 80                         | 35   | RT                 | 20         | 80 $\pm$ 3                  | 50 $\pm$ 3               | 15 $\pm$ 2               |
| H15     | 40                         | 10   | RT                 | 20         | 40 $\pm$ 2                  | 15 $\pm$ 2               | 15 $\pm$ 2               |
| H30     | 40                         | 25   | RT                 | 20         | 40 $\pm$ 2                  | 30 $\pm$ 2               | 15 $\pm$ 2               |
| L5      | 40                         | 35   | RT                 | 5          | 40 $\pm$ 2                  | 50 $\pm$ 3               | 5 $\pm$ 1                |
| L10     | 40                         | 35   | RT                 | 10         | 40 $\pm$ 2                  | 50 $\pm$ 3               | 10 $\pm$ 2               |

### Tape peeling tests:

As can be seen in Fig. S2, with the increase of tapping cycles, CA decreases and SA increases gradually. But the CA keeps larger than  $150^\circ$  and SA stays less than  $10^\circ$  even after 500 tapping cycles, indicating a good bonding strength between the fluoroalkyl silane layer and the micro-nanostructures.

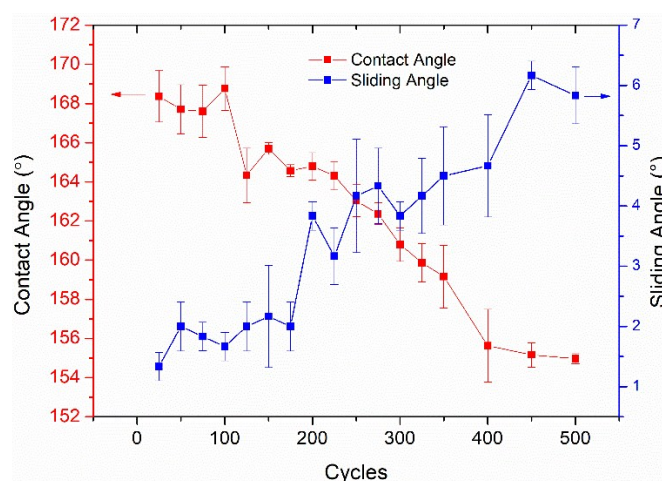

**Figure S2** Dependence of contact and sliding angles vs. tapping cycles

**Table S2.**  $P_{CCA}$ ,  $P_{CTD}$  and  $P_{CCB}$  of different MNR surfaces with different structural parameters and whether Wenzel state occurs or not (All the measured/calculated numerical values are averages. The uncertainties can be found in *Methods Section*.)

| Periodicity<br>( $\mu\text{m}$ ) | Height<br>( $\mu\text{m}$ ) | Nanorod length<br>( $\mu\text{m}$ ) | Laplace Pressures<br>(Pa) |           |           | Wenzel<br>state |
|----------------------------------|-----------------------------|-------------------------------------|---------------------------|-----------|-----------|-----------------|
|                                  |                             |                                     | $P_{CCA}$                 | $P_{CTD}$ | $P_{CCB}$ |                 |
| 40                               | 50                          | 15                                  | 1100                      | 845       | 845       | Yes             |
| 60                               | 50                          | 15                                  | 900                       | 600       | 600       | Yes             |
| 80                               | 50                          | 15                                  | 678                       | 400       | 400       | Yes             |
| 40                               | 15                          | 15                                  | 912                       | 860       | 860       | Yes             |
| 40                               | 30                          | 15                                  | 1030                      | 886       | 886       | Yes             |
| 40                               | 50                          | 5                                   | 370                       | 560       | 370       | No              |
| 40                               | 50                          | 10                                  | 670                       | 700       | 670       | No              |

**Table S3.**  $P_{CCA}$ ,  $P_{CTD}$  and  $P_{CCB}$  of different hierarchical surfaces and whether Wenzel state occurs or not (All the measured/calculated numerical values are averages. The uncertainties can be found in *Methods Section*.)

| Surfaces     | Different Critical Laplace Pressure (Pa) |           |           | Wenzel state |
|--------------|------------------------------------------|-----------|-----------|--------------|
|              | $P_{CCA}$                                | $P_{CTD}$ | $P_{CCB}$ |              |
| SM           | 220                                      | 619       | 220       | No           |
| SN           | 530                                      | 682       | 530       | No           |
| MNW          | 470                                      | 675       | 470       | No           |
| MNG          | 615                                      | 824       | 615       | No           |
| MNR          | 1100                                     | 844       | 844       | YES          |
| Triple-scale | 1450                                     | 1450      | 1450      | No           |

### Calculation of CA equations for different wetting states:

In the calculation, a periodic structural unit cell with a dual-scale roughness, composed of parabolic microcone pattern covered with uniformly distributed nano-rods was considered. To avoid a mathematical instability beyond the existence of a local minimum<sup>S1</sup> and the case that the projected area of the solid surface wetted by the liquid equals to zero, a circular flat domain (top platform) on the top of the microcone pattern was assumed, as sketched in Fig. 8(a). The following additional assumptions are considered in the calculations: (i) the shape of the water droplet is hemispherical, and the solid-liquid contact line is circular; (ii) the water droplet size is much larger than the structural unit cell and the structural size is smaller than capillary length, so gravity and line tension are negligible; (iii) the volume of water penetrated in the roughness features of the substrate surface is negligible vs. the volume of the droplet. The system domain  $\Omega$  considered includes all the interfaces of the droplet, the whole textured solid surface (i.e., not only the area covered with the droplet but also the area not covered with the droplet) and the air trapped in the rough surface features.

Thus, the free energy of the system  $\Omega$  can be written as the following expression:

$$G = A_{lg} \cdot \sigma_{lg} + A_{ls} \cdot \sigma_{ls} + A_{sg} \cdot \sigma_{sg} \quad (S1)$$

In Eq. (S1),  $A_{lg}$ ,  $A_{ls}$  and  $A_{sg}$  are the areas of liquid-gas, liquid-solid, and solid-gas interfaces, respectively.  $\sigma_{lg}$ ,  $\sigma_{ls}$  and  $\sigma_{sg}$  are the specific surface free energies of liquid-gas, liquid-solid, and solid-gas interfaces, respectively.

The structural parameters subscripted  $1$ ,  $2$  and  $top$  shown in Fig. 8(a) and (b) denote the structures of nanorods, microcones and the platform on the top of the microcone, respectively.  $f_i$  and  $r_i$  ( $i=1, 2$  and  $top$ , respectively) denote the surface fraction and roughness factor (the ratio of the real surface area to the planar surface

area) of the corresponding structures.  $a_1$ , and  $h_1$  are the hip diameter and height of the microcones.  $D_2$  and  $h_2$  are the diameter and height of nanorods.  $b_1$  and  $b_2$  denote the interval between two microcones and two nanorods, respectively. The radius of the top platform is assumed to be  $a_1/k$  ( $k > 1$ , denotes the proportion of the top platform diameter to the hip diameter of the microcones.). All the structural parameters are schematically shown in Fig. 8(a) and (b).

For CB-CB:

$$\cos \theta_E^{CB-CB} = f_2 \cdot f_{top} \cdot \cos \theta_0 + f_2 \cdot f_{top} - 1 \quad (S2)$$

in which,  $\theta_0$  is the intrinsic CA of copper after fluoroalkyl silane chemical modification.

For CB-W:

$$\cos \theta_E^{CB-W} = r_2 \cdot r_1 \cdot \cos \theta_0 \quad (S3)$$

For W-CB:

$$\cos \theta_E^{W-CB} = f_2 \cdot r_1 \cdot \cos \theta_0 - r_1^* \quad (S4)$$

For W-W:

$$\cos \theta_E^{W-W} = r_2 \cdot f_{top} \cdot \cos \theta_0 + f_{top} - 1 \quad (S5)$$

In above equations,

$$f_{top} = \pi(a_1/k)^2 / (a_1 + b_1)^2$$

$$r_2 = 1 + 4 \cdot f_2 \cdot h_2 / D_2$$

$$r_1 = [S_1 + \pi(a_1/k)^2 - \pi a_1^2] / (a_1 + b_1)^2 - 1$$

$$r_1^* = \frac{(S_2 - S_1 \cdot f_2) + \pi(1 - f_2) \cdot [(a_1/k)^2 - (a_1 + h_2 \cdot \sin \theta^*)^2]}{(a_1 + b_1)^2} + 1 - f_2$$

where

$$S_1 = \int_{\frac{a_1}{k}}^{a_1} 2x\pi \sqrt{1 + y_1'^2} dx$$



$$S_2 = \int_{\frac{a_1}{k}}^{a_1 + h_2 \cdot \sin \theta^*} 2x\pi\sqrt{1 + y_2'^2} dx$$

in which  $y_1$  and  $y_2$  are the curve profile equations of the microcone and the outside edge of the nanorods normally grown along the microcone, respectively, as shown in Fig. 8(a):

$$y_1 = -h_1/a_1^2 \cdot x^2 + h_1$$

$$y_2 = -(h_1 + h_2 - h_2 \cdot \cos \theta^*) / (a_1 + h_2 \cdot \sin \theta^*)^2 \cdot x^2 + h_1 + h_2$$

Following minimization of free energy, the  $G$  for different wetting states can be written in a form as follows:

$$G = A_{ext} \cdot \sigma_{lg} + A_{total} \cdot r_1 \cdot r_2 \cdot \sigma_{sg} - \cos \theta_E \cdot A_{base} \cdot \sigma_{lg} \quad (S6)$$

In Eq. (S6),  $A_{ext} = 2\pi R^2(1 - \cos \theta)$ ,  $A_{base} = \pi R^2(1 - \cos^2 \theta)$ .  $\theta_E^i$  is the corresponding CA of the equilibrium wetting state  $i$  ( $i$ =CB-CB, CB-W, W-CB and W-W, respectively.).

Then, the normalized free energy  $G^*$  can be expressed as<sup>S2</sup>:

$$G^* = \frac{G - \sigma_{sg} \cdot r_1 \cdot r_2 \cdot S_{total}}{\sigma_{lg}} = \frac{2(1 - \cos \theta) - \cos \theta_E^i \cdot \sin^2 \theta}{(2 - 3\cos \theta + \cos^3 \theta)^{2/3}} = \frac{2(1 - \cos \theta) - \cos \theta_E^i \cdot \sin^2 \theta}{((\cos \theta - 1)^2 (\cos \theta + 2))^{2/3}} \quad (S7)$$

The first derivative of  $G$  versus  $\cos \theta$  is:

$$\frac{\partial G^*}{\partial \cos \theta} = \frac{(\cos \theta - \cos \theta_E^i)(\cos \theta + 1)^2}{[(\cos \theta - 1)^2 (\cos \theta + 2)]^{5/3}} \quad (S8)$$

It can be seen from Eq. (S8) that the minimum free energy will be obtained at  $\theta=180^\circ$ ,

( $\cos \theta = -1$ ) or  $\cos \theta = \cos \theta_E^i$  when  $\frac{\partial G^*}{\partial \cos \theta} = 0$ . Since  $\theta=180^\circ$  doesn't correspond to a real case of a droplet sitting on a solid surface, the minimum free energy can only be taken when  $\cos \theta = \cos \theta_E$ .

**Reference:**

S1 A. Marmor, *Langmuir*, 2003, 19, 8343-8348.

S2 H. Wu, K. Zhu, B. Wu, J. Lou, Z. Zhang and G. Chai, *Appl. Surf. Sci.*, 2016, 382, 111-120.

### Monotonicity Analysis of The Normalized Free Energy $G^*$

According to Eq. (S7), when  $\theta = \theta_E^i$ , the normalized free energy can be written as follows:

$$G^* = (2 - 3\cos\theta + \cos^3\theta)^{1/3} \quad (\text{S9})$$

Then the first derivative of  $G^*$  versus  $\cos\theta$  is:

$$\frac{dG^*}{d\cos\theta} = \frac{\cos^2\theta - 1}{(2 - 3\cos\theta + \cos^3\theta)^{2/3}} = \frac{\cos^2\theta - 1}{((\cos\theta - 1)^2(\cos\theta + 2))^{2/3}} \quad (\text{S10})$$

Since  $-1 < \cos\theta < 1$  ( $0 < \theta < 180^\circ$ ) and  $0 < \cos^2\theta < 1$ , it is easy to see that  $\frac{dG^*}{d\cos\theta} < 0$ , indicating that  $G^*$  is monotonically decreasing with  $\cos\theta$ . However,  $\cos\theta$  is monotonically decreasing with  $\theta$  ( $0 < \theta < 180^\circ$ ), thus  $G^*$  is monotonically increasing with  $\theta$ .

**Table S4.** Comparison of critical Laplace Pressure<sup>1</sup> of the two and triple-scale hierarchical micro-nano structures fabricated in present study with several typical previous reports

| References    | Metal                  | Structures                                              | Fabrication method                  | Laplace Pressure (Pa) | Year |
|---------------|------------------------|---------------------------------------------------------|-------------------------------------|-----------------------|------|
| 28            | Silicon                | Single-scale: micropillars                              | Chemical Vapor Deposition           | 200Pa                 | 2019 |
| 23            | Cu                     | Two-scale: Microcones with nanoparticles                | Ultrafast Laser                     | 400 Pa                | 2016 |
| 27            | PDMS                   | Single-scale: micropillars                              | photolithography                    | <200Pa                | 2016 |
| 30            | copper                 | Mushroom-like structure                                 | photolithography and electroplating | <800Pa                | 2015 |
| 46            | PDMS                   | Single-scale: Micropillars                              | lithography                         | <700Pa                | 2013 |
| 31            | Silica                 | Single-scale: micropillars                              | Sol-gel +Lithography                | <300Pa                | 2013 |
| 35            | Silicon                | Two-scale: Micro and nano-sheets                        | Two steps of Thermal Deposition     | <300Pa                | 2013 |
| 32            | PDMS                   | Single-scale: Micropillars                              | --                                  | <300Pa                | 2011 |
| 29            | PDMS                   | Single-scale: Micropillars                              | micromolding                        | ~500 Pa               | 2010 |
| 47            | Silicon                | Single scale: sharp-tip nanoposts                       | Lithography+ Reactive Ion Etching   | 500 Pa                | 2009 |
| 48            | silicon                | Single-scale: Micropillars                              | Photolithography                    | <300 Pa               | 2007 |
| 49            | PDMS silicon elastomer | Single-scale: Micropillars                              | Soft-Lithography                    | <450 Pa               | 2006 |
| This research | Cu                     | Two-scale: Microcones with nanorods                     | Ultrafast Laser+Chemical            | 845 Pa                | --   |
| This research | Cu                     | Three-scale: Microcones with nanosheets and micro-balls | Ultrafast Laser+Chemical            | 1450 Pa               | --   |

<sup>1</sup> The critical Laplace pressure in others' studies are actually the critical Laplace pressure  $P_{CCA}$ , denoting the transition from superhydrophobic to hydrophobic state; while the critical Laplace pressure in present study is the critical Laplace pressure  $P_{CCB}$ , which can comprehensively indicate the critical moment that a droplet loses its CB state on a superhydrophobic surface.

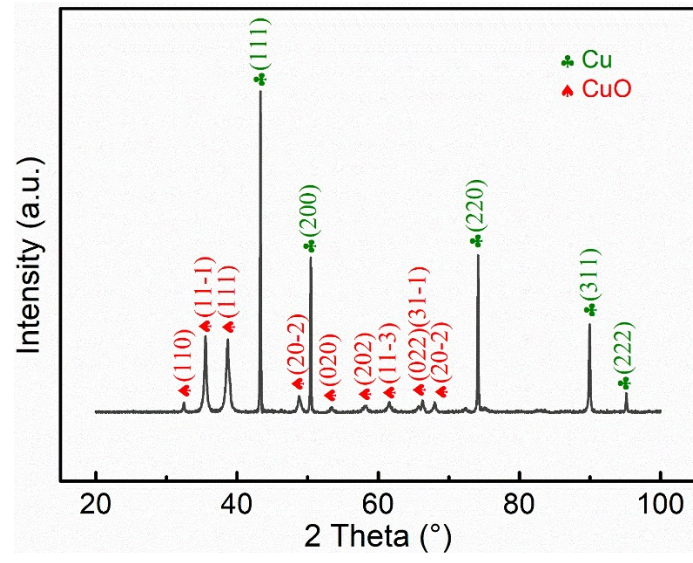

**Figure S3.** XRD analysis of the prepared superhydrophobic surface with triple-scale structures

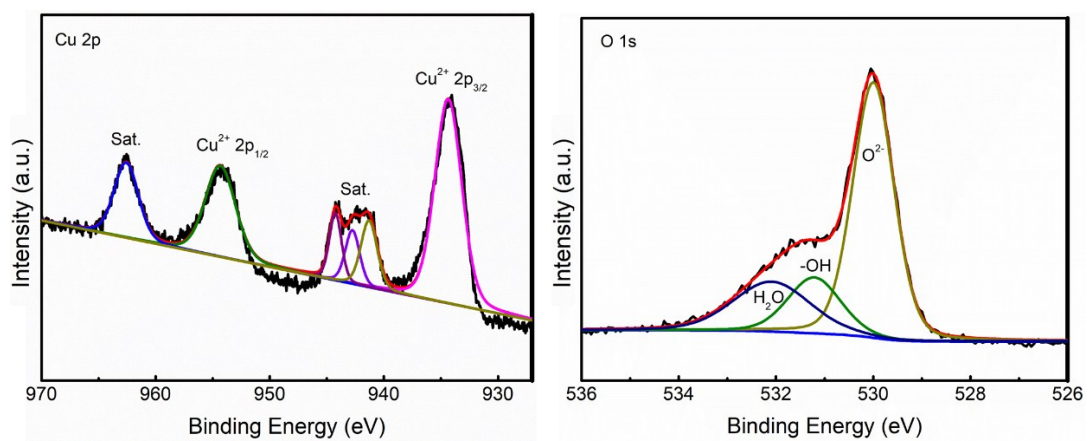

**Figure S4** XPS analysis of the prepared superhydrophobic surface with triple-scale structures

### Calculation Method of the Laplace Pressure:

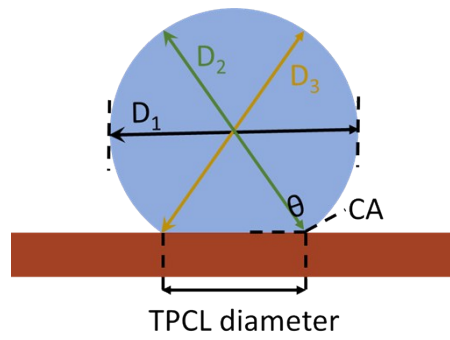

**Figure S5.** The schematic of a droplet sitting on a superhydrophobic surface

Laplace pressure  $P$  in present study is calculated by the following equation:

$$P = \frac{2\gamma}{R} = \frac{2\gamma}{\left(\frac{1}{3}\right)\left(\frac{1}{2}\sum_1^3 D\right)} = \frac{12\gamma}{D_1 + D_2 + D_3} \quad (\text{S11})$$

in which,  $\gamma$  is the surface tension of water;  $R$  is the averaged radius of the water droplet;

$D_1$ ,  $D_2$  and  $D_3$  are illustrated in Fig. S3.
